# Supplementary material for: Fabrication of MoS2/TiO2 heterostructures with enhanced photocatalytic activity
Source: Royal Society of Chemistry journal article supplement (doi:10.1039/c9ce00056a), 2019-01-01
Supplement: c9ce00056a1.pdf [file c9ce00056a1.pdf]

Fabrication of MoS<sub>2</sub>/TiO<sub>2</sub> heterostructure with enhanced photocatalytic activity

Yi Lin <sup>1\*</sup>, Pinyun Ren <sup>2</sup>, Chengyang Wei <sup>3</sup>

<sup>1</sup> School of Materials Science and Engineering, Sichuan University of Science & Engineering, Zigong  
643000, PR China

<sup>2</sup> School of Physics and Electronic Engineering, Sichuan University of Science & Engineering, Zigong  
643000, PR China

<sup>3</sup> Advanced metal materials research laboratory, Guangdong Zhaoqing Institute of Quality Inspection &  
Metrology, Zhaoqing 526000, PR China

**Table S1** The average grain size of TiO<sub>2</sub> and MoS<sub>2</sub>/TiO<sub>2</sub>.

| Sample                                    | Average grain size / nm |
|-------------------------------------------|-------------------------|
| TiO <sub>2</sub> (T)                      | 8.7                     |
| MoS <sub>2</sub> /TiO <sub>2</sub> (5MT)  | 52.0                    |
| MoS <sub>2</sub> /TiO <sub>2</sub> (10MT) | 55.6                    |
| MoS <sub>2</sub> /TiO <sub>2</sub> (30MT) | 54.2                    |
| MoS <sub>2</sub> /TiO <sub>2</sub> (50MT) | 63.6                    |

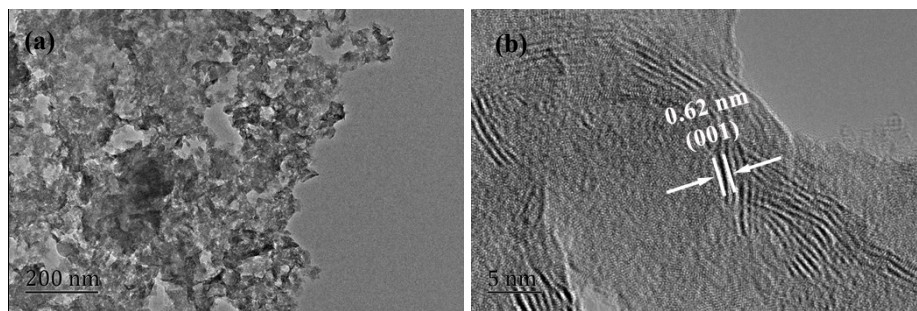

**Fig. S1.** TEM (a) and HRTEM (b) image of pure MoS<sub>2</sub>

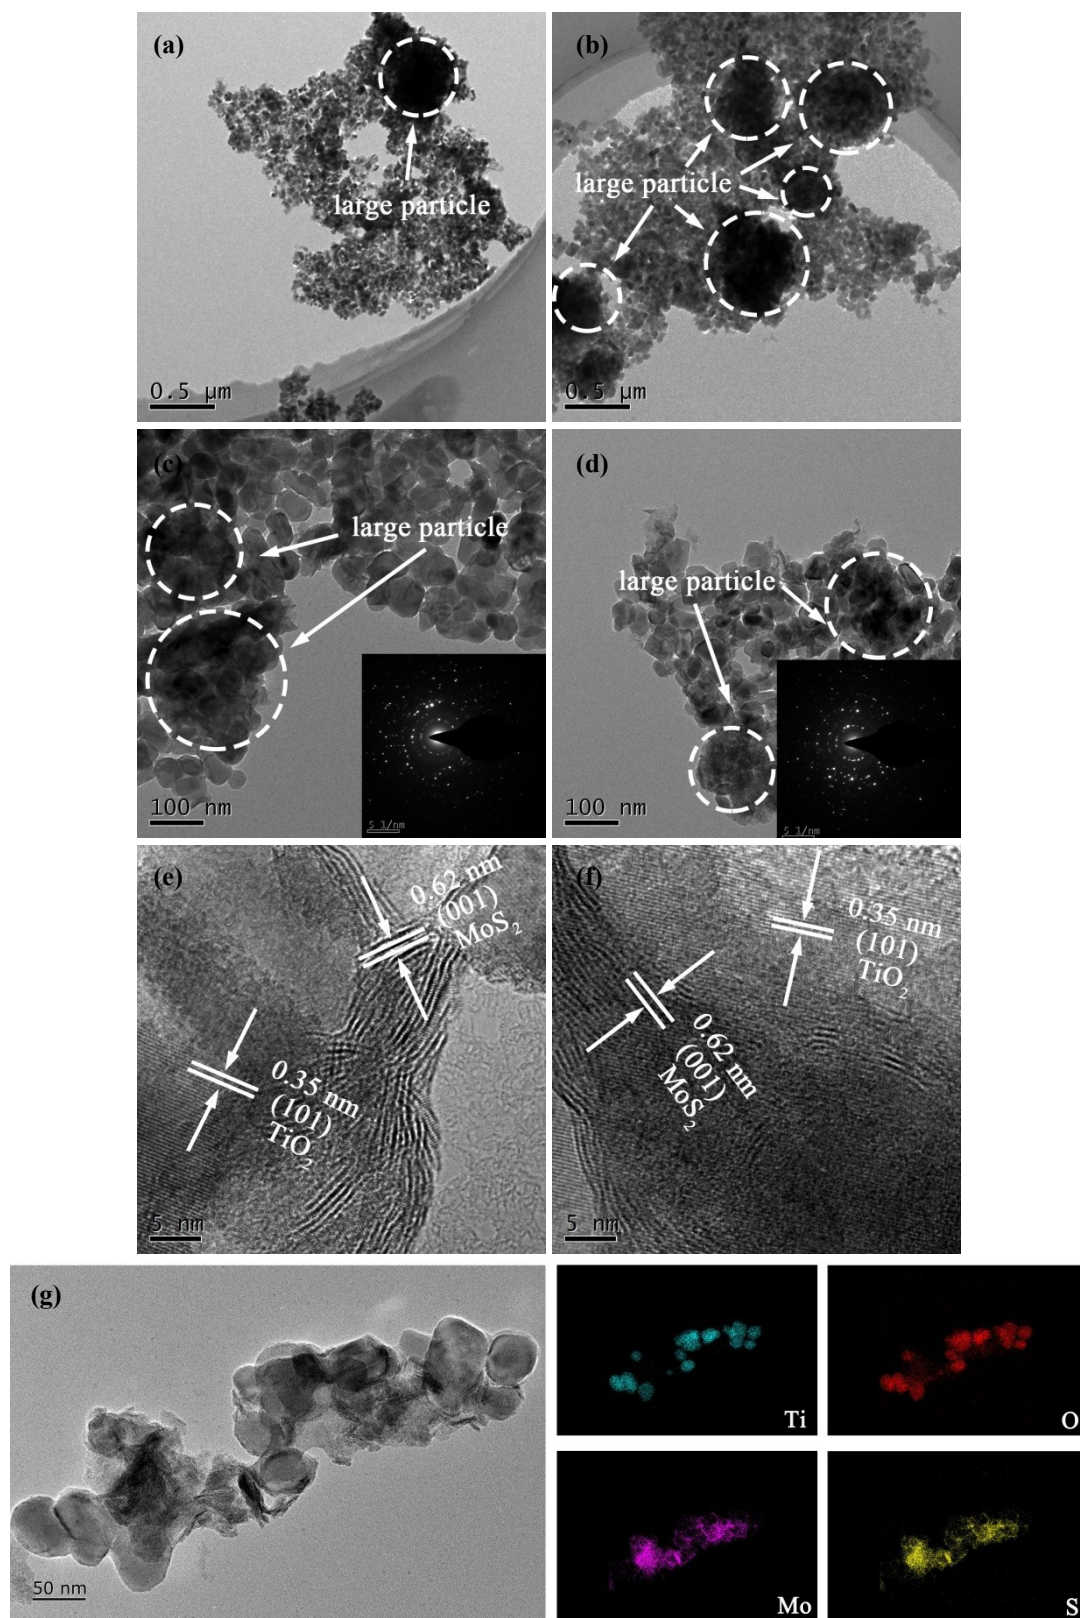

**Fig. S2.** TEM (a, b, c and d) and HRTEM (e and f) images of MoS<sub>2</sub>/TiO<sub>2</sub> (50MT), and the EDS mapping (g).

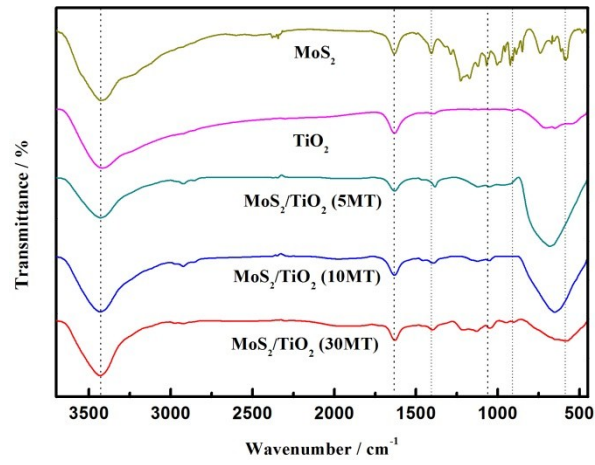

**Fig. S3.** FT-IR spectra of the MoS<sub>2</sub>, TiO<sub>2</sub> and MoS<sub>2</sub>/TiO<sub>2</sub>.

To ascertain the contributions of reactive species in the photocatalytic degradation of RhB, the trapping experiments were carried out, and the ethylene diamine tetraacetic acid (EDTA), isopropanol (IPA) and benzoquinone (BQ) were used as scavengers to quench photogenerated hole  $h^+$ , hydroxyl free radical  $\bullet\text{OH}$  and superoxide radical anion  $\bullet\text{O}^{2-}$ , respectively. The degradation efficiency of RhB over  $\text{MoS}_2/\text{TiO}_2$  (10MT) samples with different scavengers is shown in Fig. S2. The degradation rate of RhB without any scavengers after illuminated for 2 h was 93%. After EDTA was added to the solution, the degradation rate decreased to 53 %, and the degradation efficiency was also quenched to 31 % when adding the BQ as a scavenger, illustrating that  $h^+$  and  $\bullet\text{O}^{2-}$  are crucial active species in the photocatalytic degradation process. However, a tiny decrease in the degradation rate of RhB is observed after the addition of IPA, indicating that  $\bullet\text{OH}$  has a minor effect on the photocatalytic reaction, which may due to the valence band edge potential of  $\text{MoS}_2$  is not sufficiently high to oxidize the  $\text{H}_2\text{O}$  or hydroxide ions to produce  $\bullet\text{OH}$ .

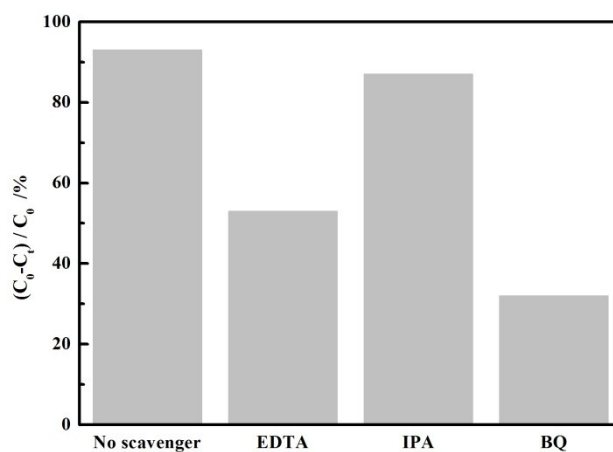

**Fig. S4.** Trapping experiments of photocatalytic degradation of RhB over  $\text{MoS}_2/\text{TiO}_2$  (10MT).

From the mass spectra, these identified intermediates with  $m/z$  value of 443, 415, 387, 359 were those of initial RhB, N-de-ethylated intermediates such as N, N-diethyl-N'-ethylrhodamine, N, N-diethylrhodamine, N-ethyl-N'-ethylrhodamine, N-ethylrhodamine respectively, which were further degraded into possible intermediate corresponding to the  $m/z$  values of 331. This intermediate could be further degraded into  $m/z$  values of 149 (N, N-diethylaniline) and 125 (N-ethylmaleimide). These intermediate compounds are similar to previous studies on the degradation of RhB<sup>1,2</sup>. According to the observation, it can confirm that RhB were photocatalytic degraded under the MoS<sub>2</sub>/TiO<sub>2</sub> system.

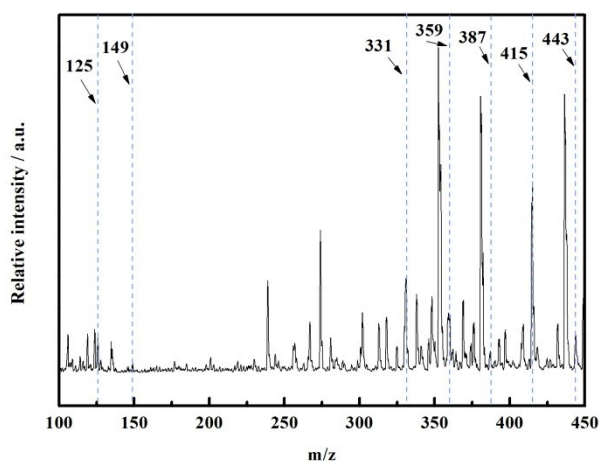

**Fig. S5.** LC-MS spectra of the photodegradation products of RhB.

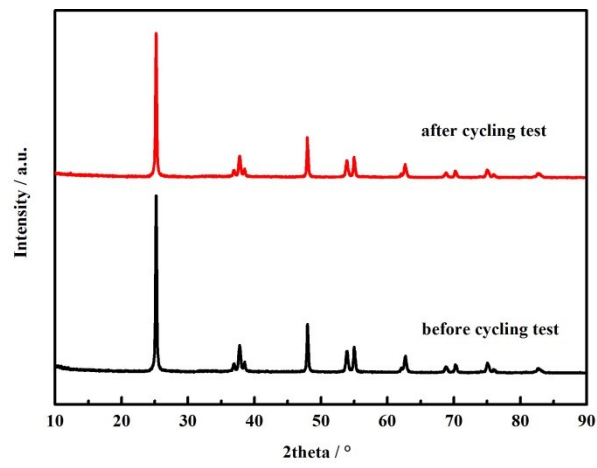

**Fig. S6.** XRD patterns of MoS<sub>2</sub>/TiO<sub>2</sub> (10MT) before and after cycling test.



**Table S2** Photocatalytic hydrogen generation performance of previous reports.

| Sample                                               | Light source  | Average hydrogen production rate           | Reference |
|------------------------------------------------------|---------------|--------------------------------------------|-----------|
| TiO <sub>2</sub> @MoS <sub>2</sub>                   | 300 W Xe lamp | 1.68 mmol h <sup>-1</sup> g <sup>-1</sup>  | 3         |
| 2D-2D MoS <sub>2</sub> /TiO <sub>2</sub>             | 300 W Xe lamp | 2.15 mmol h <sup>-1</sup> g <sup>-1</sup>  | 4         |
| TiO <sub>2</sub> /MoS <sub>2</sub> /graphene         | 350 W Xe lamp | 1.65 mmol h <sup>-1</sup> g <sup>-1</sup>  | 5         |
| TiO <sub>2</sub> @MoS <sub>2</sub>                   | 300 W Xe lamp | 1.60 mmol h <sup>-1</sup> g <sup>-1</sup>  | 6         |
| TiO <sub>2</sub> /MoS <sub>2</sub> /TiO <sub>2</sub> | 300 W Xe lamp | 0.56 mmol h <sup>-1</sup> g <sup>-1</sup>  | 7         |
| N-TiO <sub>2-x</sub> @MoS <sub>2</sub>               | /             | 1.882 mmol h <sup>-1</sup> g <sup>-1</sup> | 8         |
| MoS <sub>2</sub> Quantum Dots@TiO <sub>2</sub>       | 300 W Xe lamp | 0.135 mmol h <sup>-1</sup> g <sup>-1</sup> | 9         |
| MoS <sub>2</sub> /TiO <sub>2</sub> (10MT, this work) | 300 W Xe lamp | 1.93 mmol h <sup>-1</sup> g <sup>-1</sup>  |           |

**Table S3** The impedance parameters derived by fitting the EIS responses on TiO<sub>2</sub> and MoS<sub>2</sub>/TiO<sub>2</sub> in 0.1 M Na<sub>2</sub>SO<sub>4</sub>.

| Sample                                    | R <sub>s</sub> (Ω) | R <sub>ct</sub> (Ω)  | CPE (mF/cm <sup>2</sup> ) |
|-------------------------------------------|--------------------|----------------------|---------------------------|
| TiO <sub>2</sub> (T)                      | 113.96             | 1.61×10 <sup>7</sup> | 0.95                      |
| MoS <sub>2</sub> /TiO <sub>2</sub> (5MT)  | 114.47             | 2.54×10 <sup>6</sup> | 0.92                      |
| MoS <sub>2</sub> /TiO <sub>2</sub> (10MT) | 117.13             | 2.04×10 <sup>6</sup> | 0.82                      |
| MoS <sub>2</sub> /TiO <sub>2</sub> (30MT) | 118.56             | 3.26×10 <sup>6</sup> | 0.88                      |
| MoS <sub>2</sub> /TiO <sub>2</sub> (50MT) | 116.12             | 4.99×10 <sup>6</sup> | 0.92                      |

## References

1. T. S. Natarajan, M. Thomas, K. Natarajan, H. C. Bajaj and R. J. Tayade, *Chemical Engineering Journal*, 2011, **169**, 126-134.
2. M. Rakibuddin, S. Gazi and R. Ananthakrishnan, *Catalysis Communications*, 2015, **58**, 53-58.
3. C. Liu, L. Wang, Y. Tang, S. Luo, Y. Liu, S. Zhang, Y. Zeng and Y. Xu, *Applied Catalysis B: Environmental*, 2015, **164**, 1-9.
4. Y.-J. Yuan, Z.-J. Ye, H.-W. Lu, B. Hu, Y.-H. Li, D.-Q. Chen, J.-S. Zhong, Z.-T. Yu and Z.-G. Zou, *ACS Catalysis*, 2016, **6**, 532-541.
5. Q. Xiang, J. Yu and M. Jaroniec, *Journal of the American Chemical Society*, 2012, **134**, 6575-6578.
6. W. Zhou, Z. Yin, Y. Du, X. Huang, Z. Zeng, Z. Fan, H. Liu, J. Wang and H. Zhang, *Small*, 2013, **9**, 140-147.
7. X. Liu, Z. Xing, H. Zhang, W. Wang, Y. Zhang, Z. Li, X. Wu, X. Yu and W. Zhou, *ChemSusChem*, 2016, **9**, 1118-1124.
8. X. Liu, Z. Xing, Y. Zhang, Z. Li, X. Wu, S. Tan, X. Yu, Q. Zhu and W. Zhou, *Applied Catalysis B: Environmental*, 2017, **201**, 119-127.
9. Q. Wang, J. Huang, H. Sun, Y. H. Ng, K.-Q. Zhang and Y. Lai, *ChemSusChem*, 2018, **11**, 1708-1721.
